# Supplementary figures and images for: Eukaryote-specific rRNA expansion segments function in ribosome biogenesis
Source: PubMed Central journal article supplement — RNA. 2016 Aug;22(8):1153–62. doi: 10.1261/rna.056705.116 (PMC4931108; doi:10.1261/rna.056705.116), 2016-08

# Supplementary Figure 1

A

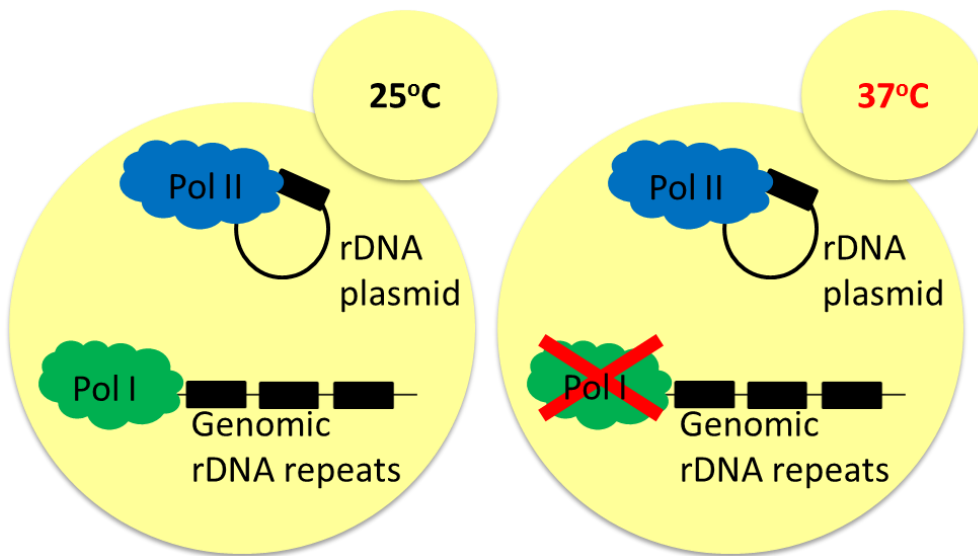

B

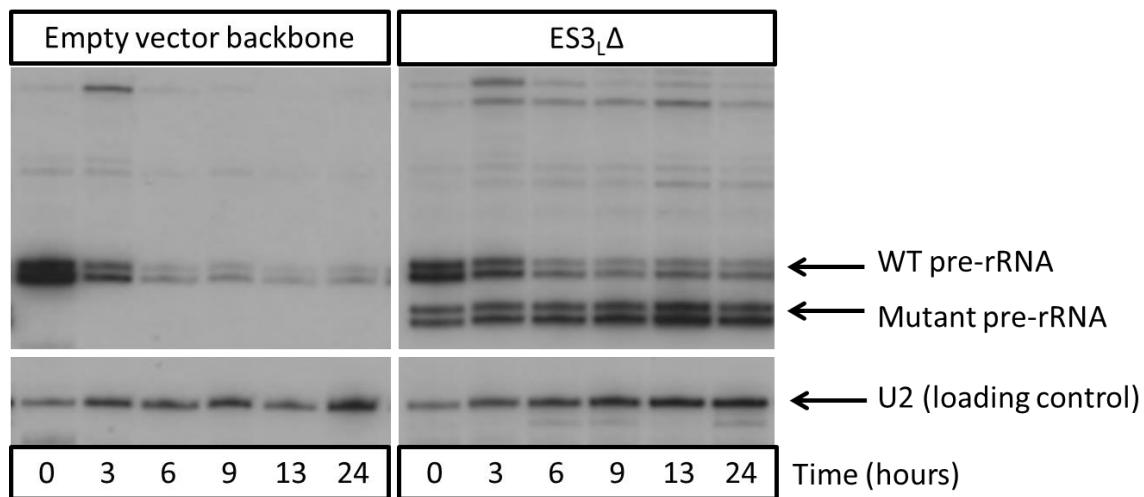

# Supplementary Figure 2

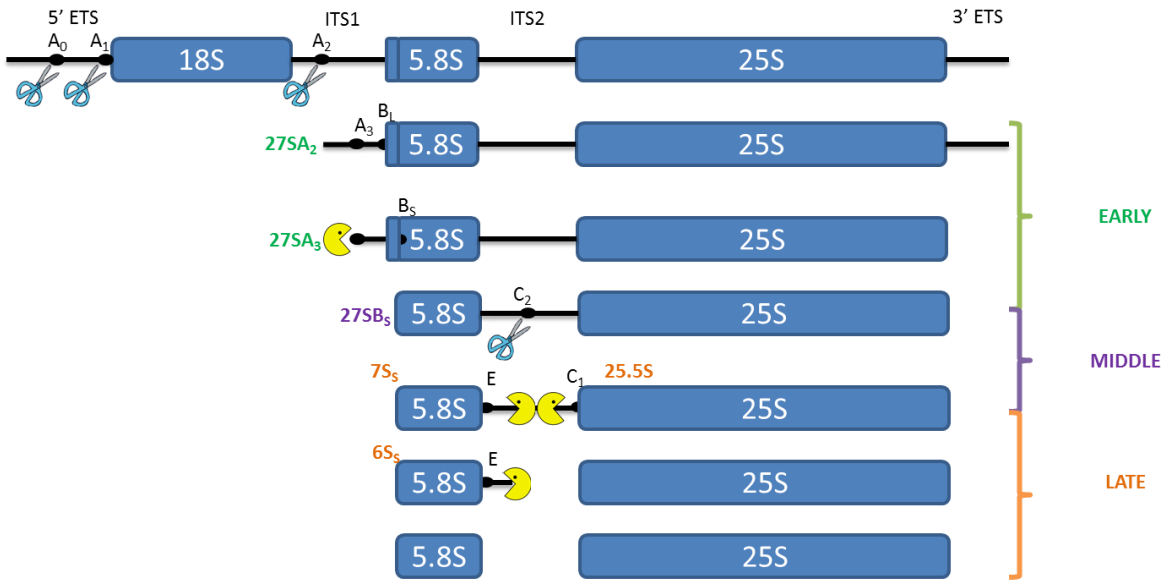



# Supplementary Figure 4

A

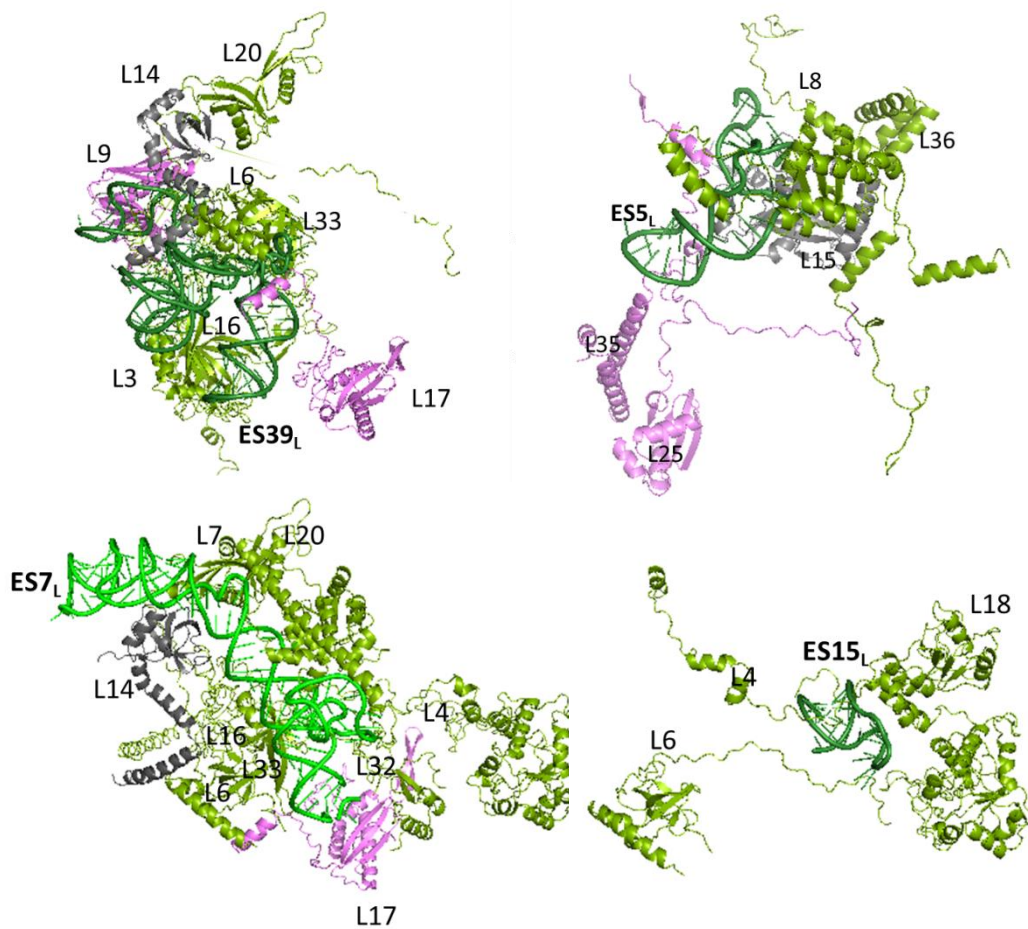

B

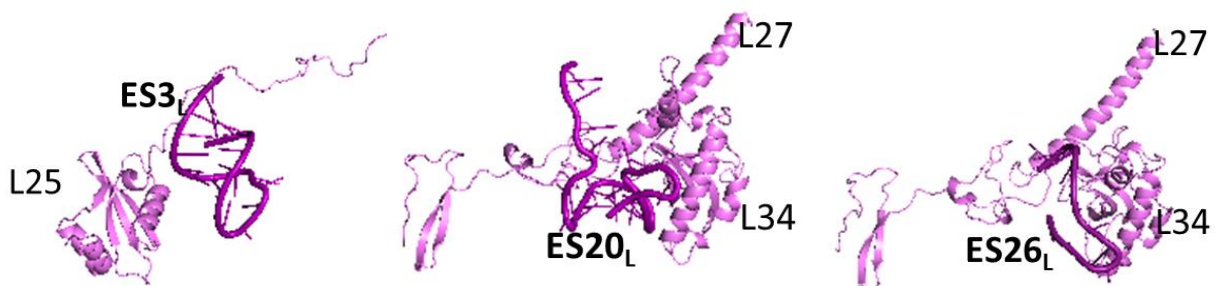

C

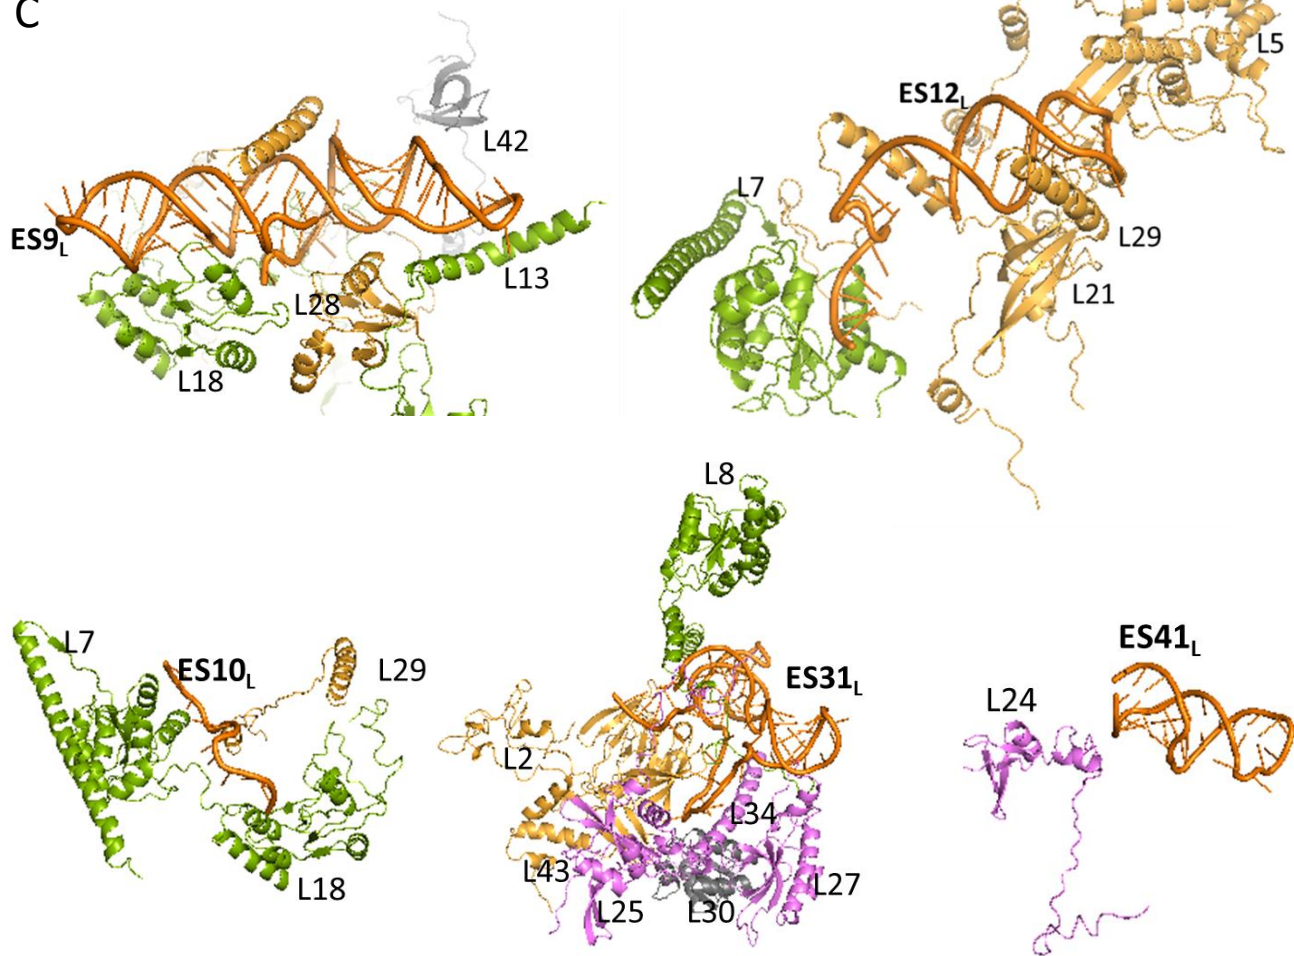

Supplement: supp_056705.116_Supplemental_Figures.pdf [file supp_056705.116_Supplemental_Figures.pdf]
